# Supplementary material
Source: ML conference proceedings conference paper supplement (https://openreview.net/forum?id=MHZaDAoYru)

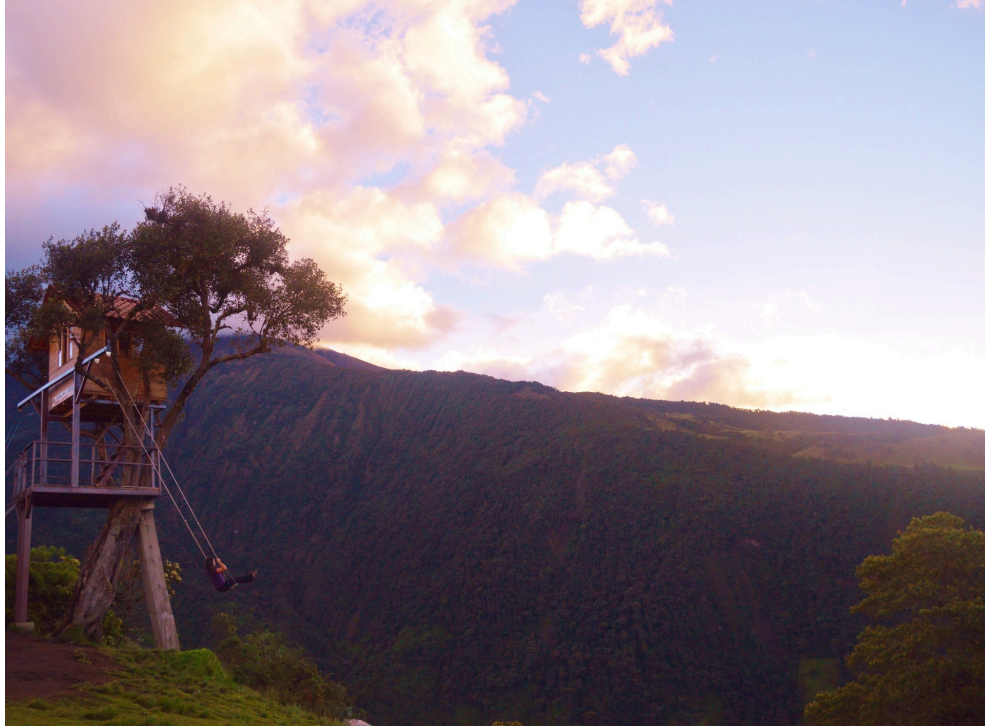

**What is the color of the woman's shirt?\n(A) white\n(B) purple\n(C) blue\n(D) pink\nAnswer with the option's letter from the given choices directly.**

**Ours:** <think>To determine the woman's shirt color, I need to locate her within the image and observe her attire.\n\nThe woman is swinging on a rope from a treehouse. To accurately identify her shirt color, I will generate a zoomed-in view of her upper body.\n\n<|latent\_start|><|latent\_pad|><|latent\_pad|><|latent\_pad|><|latent\_pad|><|latent\_pad|><|latent\_pad|><|latent\_pad|><|latent\_pad|><|latent\_pad|><|latent\_pad|><|latent\_pad|><|latent\_pad|><|latent\_pad|><|latent\_pad|><|latent\_pad|>\n\nThe zoomed-in image clearly shows the woman wearing a purple top.\n\nBased on this clear visual evidence, the color of her shirt can be definitively identified.</think><answer>Final Answer: B</answer><|im\_end|>.

**Qwen:**<think>The question asks for the color of the woman's shirt. Observing the image, the woman appears to be wearing a shirt that is a shade of purple. The other options (pink, blue, and white) do not match the visible color of the shirt in the image. Therefore, the correct answer is A.</think> \n<answer>A. The color of the woman's shirt is purple.</answer>"



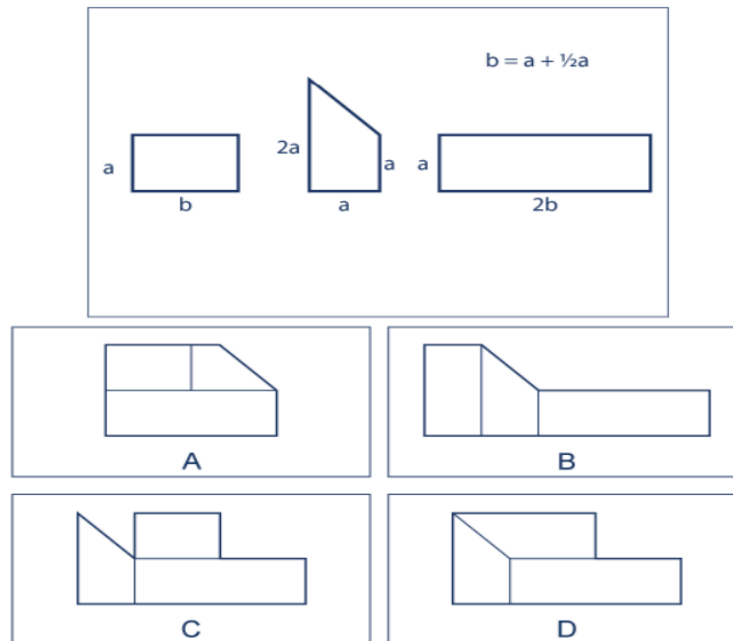

Which figure can be formed with the given piece? Select from A, B, C, and D. (A) (B) (C) (D)

**Ours:** The problem asks to identify which of the provided options can be created using the single piece shown in the diagram. To determine the correct option, I will visualize how the piece fits into each potential shape. Placing the piece into option A shows that it does not fit correctly; there is a gap on the left side. Placing the piece into option B reveals that it also does not fit properly, leaving gaps or overlapping. When placing the piece into option C, it appears to fit perfectly, completing the shape without gaps or overlaps. Testing option D shows that this piece does not match the required shape for a seamless fit. Based on the visual fitting, only option C allows the piece to complete the figure seamlessly. Final Answer: C

**Qwen:** To determine which figure can be formed using the given piece, let's analyze it step by step:  
 1. The given piece consists of a rectangle cut into two smaller shapes:  
   - A right triangle with legs 'a' and '2a'  
   - A square with side 'a'  
 2. We need to check if any of the provided figures match these components.  
 Looking at the options:  
 A. This figure has a right triangle with legs 'a' and 'b', where 'b' is not equal to 'a + 1/2a'. Thus, this option does not match.  
 B. This figure seems to fit the components correctly. It includes a right triangle with legs 'a' and 'b', which can be rearranged to form the original shape. Additionally, there is a square that matches the size 'a' perfectly.  
 C. This figure includes a right triangle but with legs that are not 'a' and '2a'. Therefore, this option does not match.  
 D. This figure also includes a right triangle but with different proportions than the given piece. Hence, this option does not match.  
 After careful analysis, we can conclude that figure B is the one that can be formed using the given piece. Final Answer: B

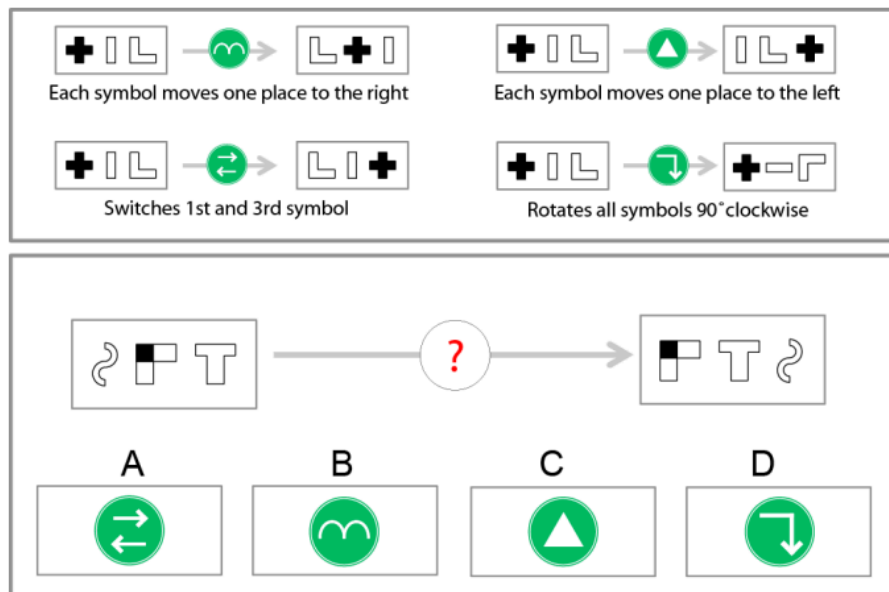

What diagram replaces the question mark? Select from A, B, C, and D. (A) (B) (C) (D).

**Ours:**The problem presents a sequence of transformations applied to a set of symbols. I need to identify the pattern governing these transformations to determine the missing element.  
Let's analyze the initial configuration of symbols and the transformation steps shown in the problem image. The first step is to visualize the result of the first operation.  
The visual thought shows the result after the first operation, which appears to be a rotation. Now, let's visualize the next step in the sequence.  
This visual thought represents the state after the second operation. Observing the sequence of operations and their effects on the symbols, the third operation is a rotation. The fourth operation involves swapping the first and third symbols.  
This final visual thought shows the outcome of all four operations. Comparing this resulting configuration with the provided options, option C matches the sequence of transformations performed.  
Final Answer: C

**Qwen:**  
To solve this, let's analyze each transformation given and apply it to the original sequence:  
1. The sequence is '+L-T'  
2. Moving symbols one place to the right: '+IL->LT'  
3. Switching 1st and 3rd symbols: 'T+I-L'  
4. Rotating all symbols 90° clockwise: 'TL+I'  
Now, we'll compare these transformations with the possible answers given:  
A: This option suggests a leftward arrow, which doesn't match any of the transformations provided.  
B: This option shows a circular icon with a 'm' inside, which doesn't align with any of the transformations described.  
C: This option shows a leftward-pointing triangle, which doesn't seem to represent any of the operations described.  
D: This option shows a rightward-pointing arrow, matching the action of moving symbols one place to the right.  
Considering the information given, the operation that matches moving symbols one place to the right is represented by the rightward arrow. Therefore, the correct answer is:  
Final Answer: D



## Visualization:

To demonstrate that the generated visual tokens truly contribute to the model's reasoning in visual search, we extract all attention maps associated with the 32 visual tokens at an intermediate layer (Layer 14) and average them. The resulting attention heatmap is shown below.

Question ID: 0  
Q: What is the material of the glove?  
(A) rubber  
(B) cotton  
(C) kevlar  
(D) leather  
Answer with the opti...  
Label: A

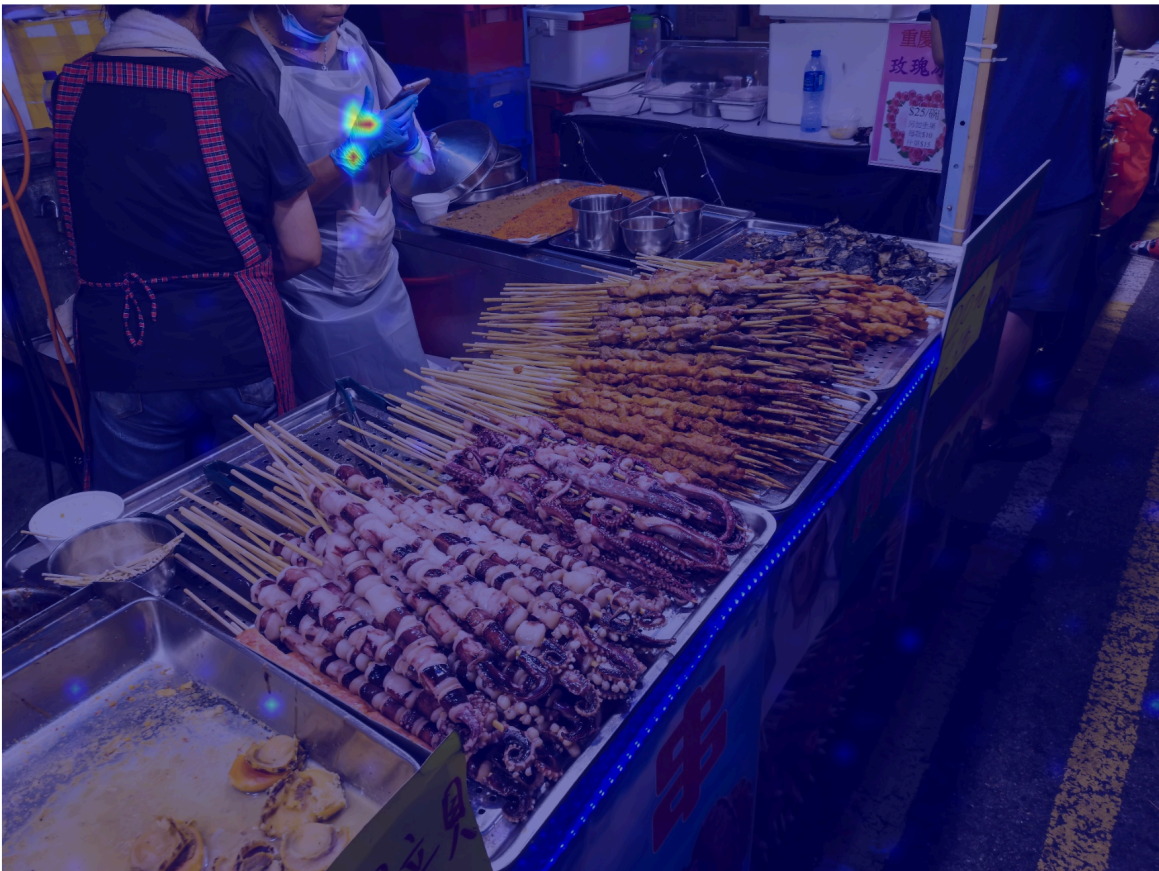

Question ID: 7  
Q: What is the color of the Apple logo?  
(A) polychromatic  
(B) red  
(C) white  
(D) silver  
Answer with the ...  
Label: A

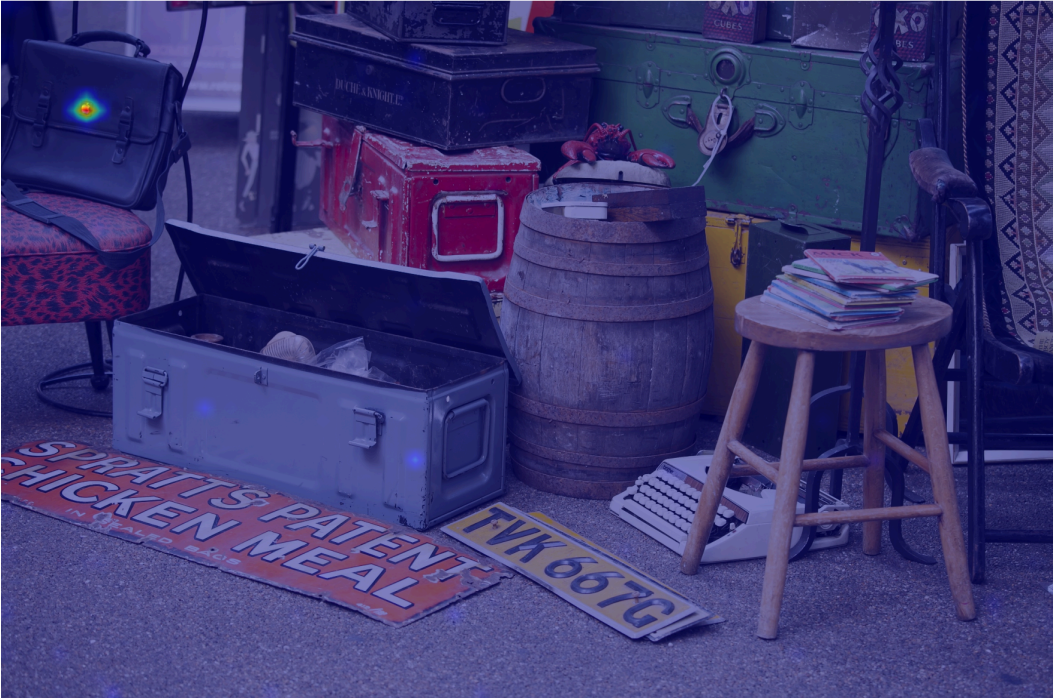

Question ID: 17  
Q: What is the color of the bicycle?  
(A) blue  
(B) white  
(C) silver  
(D) red  
Answer with the option's let...  
Label: D

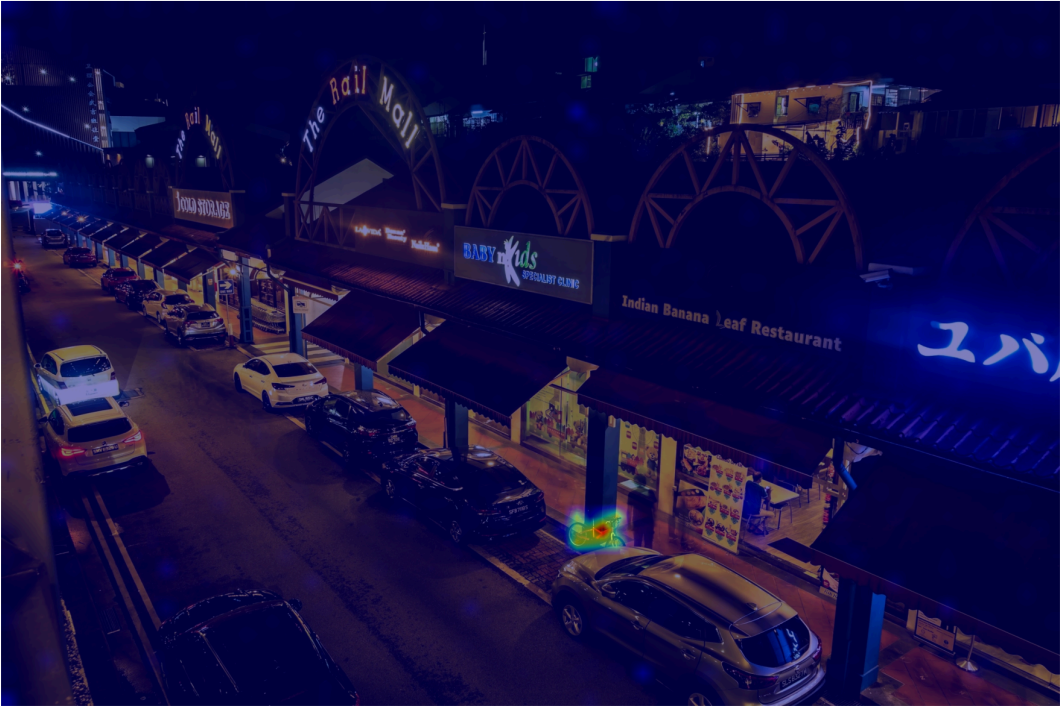

Supplement: supplementary_material [file attachment]
